# Supplementary material for: EBV-driven LMP1 and IFN-γ up-regulate PD-L1 in nasopharyngeal carcinoma: Implications for oncotargeted therapy
Source: PubMed Central journal article supplement (PMC4322961; doi:10.18632/oncotarget.2608), 2014-10-21
Supplement: oncotarget-05-12189-s001.pdf [file oncotarget-05-12189-s001.pdf]

## EBV-driven LMP1 and IFN- $\gamma$ up-regulate PD-L1 in nasopharyngeal carcinoma: Implications for oncotargeted therapy

### Supplementary Material

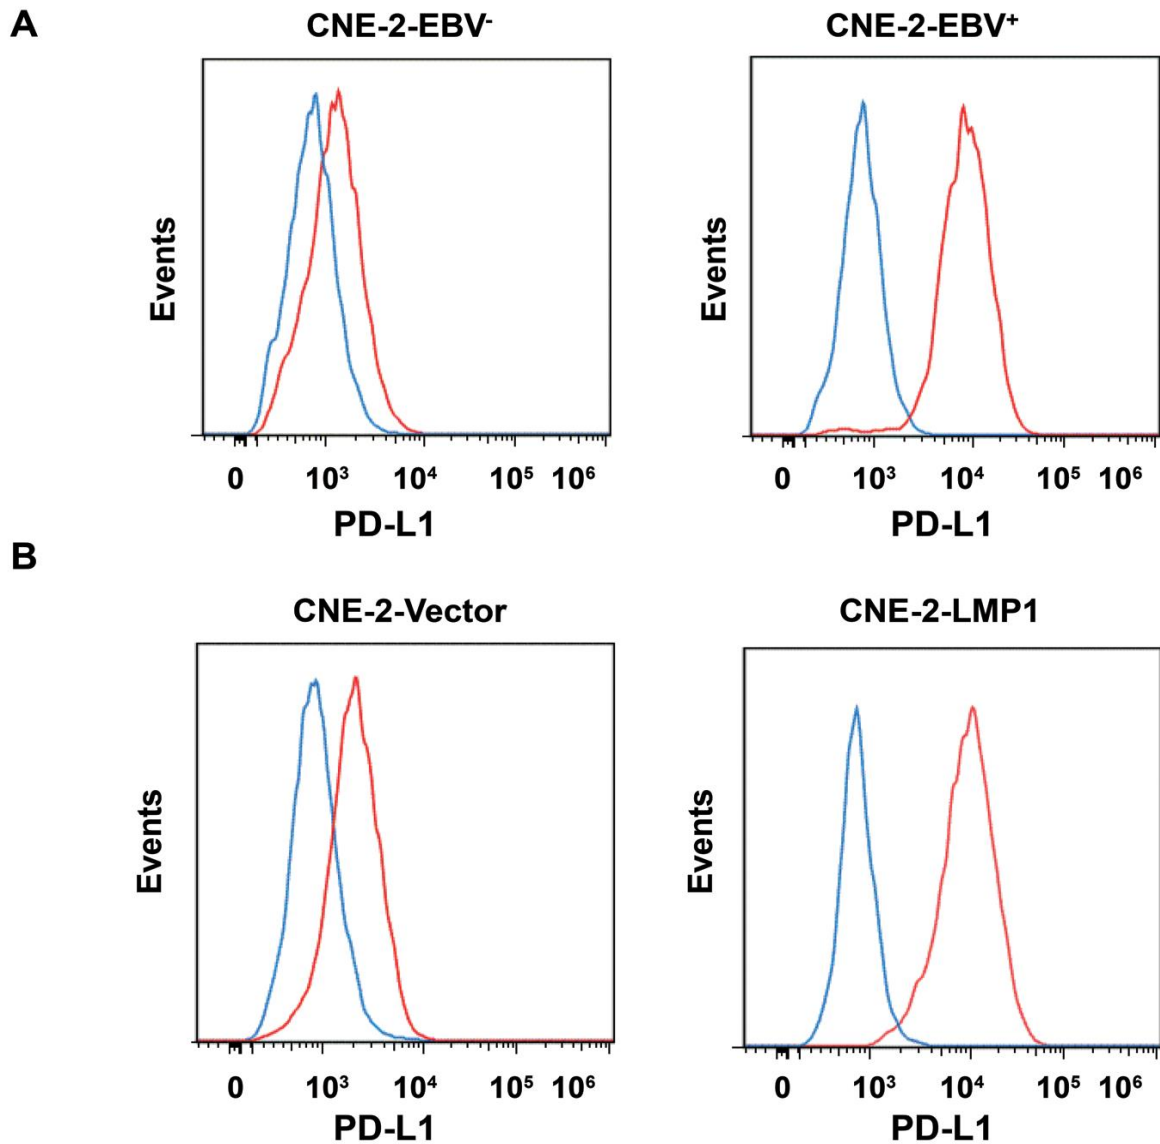

**Supplementary Figure S1:** PD-L1 expression is induced by EBV infection and LMP1 over-expression. (A) PD-L1 expression in CNE-2 and CNE-2-EBV<sup>+</sup> cells was analyzed with flow cytometry. (B) PD-L1 expression in CNE-2-Vector and CNE-2-LMP1 cells was analyzed with flow cytometry. All experiments were repeated at least three times. Representative data are shown.

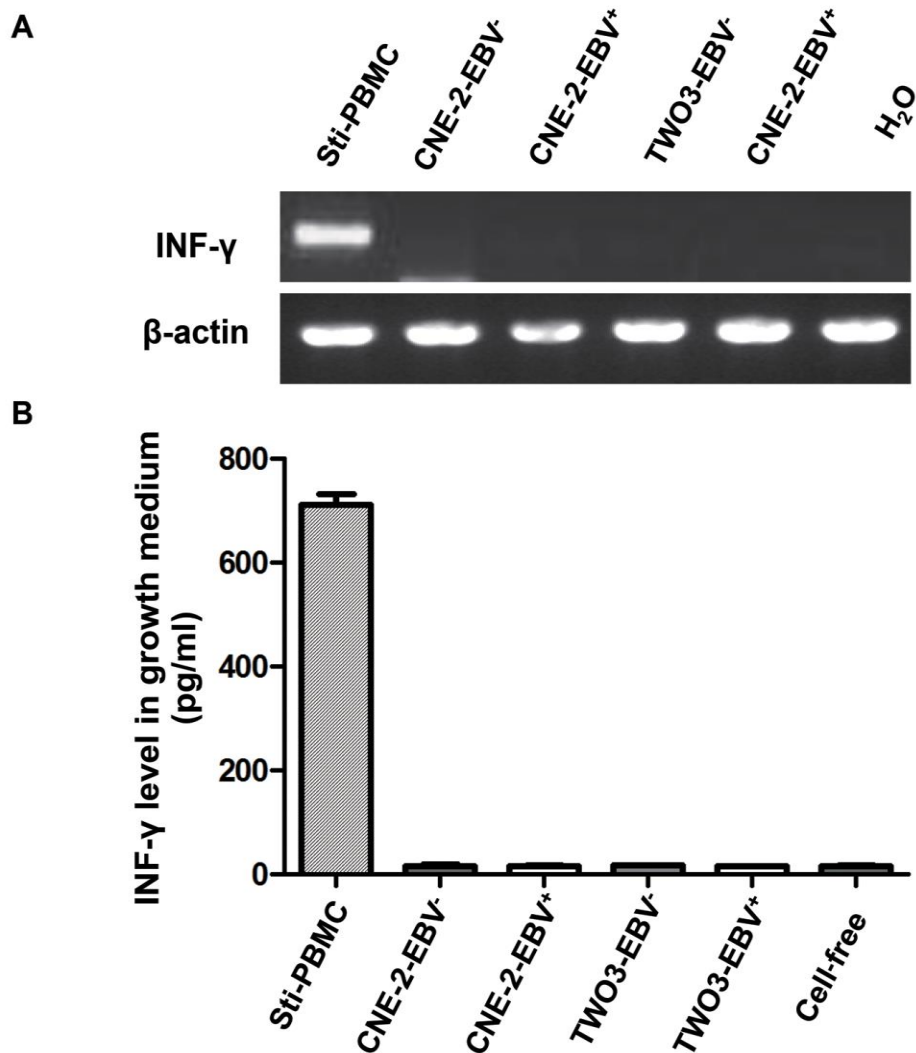

**Supplementary Figure S2:** EBV infection does not affect the INF- $\gamma$  production in human NPC cells. (A) Relative quantitative analysis PD-L1 mRNA level in CNE-2, CNE-EBV<sup>+</sup> cells and TWO3, TWO3-EBV<sup>+</sup> cells (phorbol12-myristate13-acetate (PMA) and ionomycin stimulated human PBMCs cells were used as positive control and nucleic acid free H<sub>2</sub>O was used as negative control). (B) IFN- $\gamma$  level was measured in CNE-2, TWO3 cells and EBV infected CNE-2, TWO3 cells growth medium (phorbol12-myristate13-acetate (PMA) and ionomycin stimulated human PBMCs growth medium was used as positive control and cell-free culture medium was used as negative control).

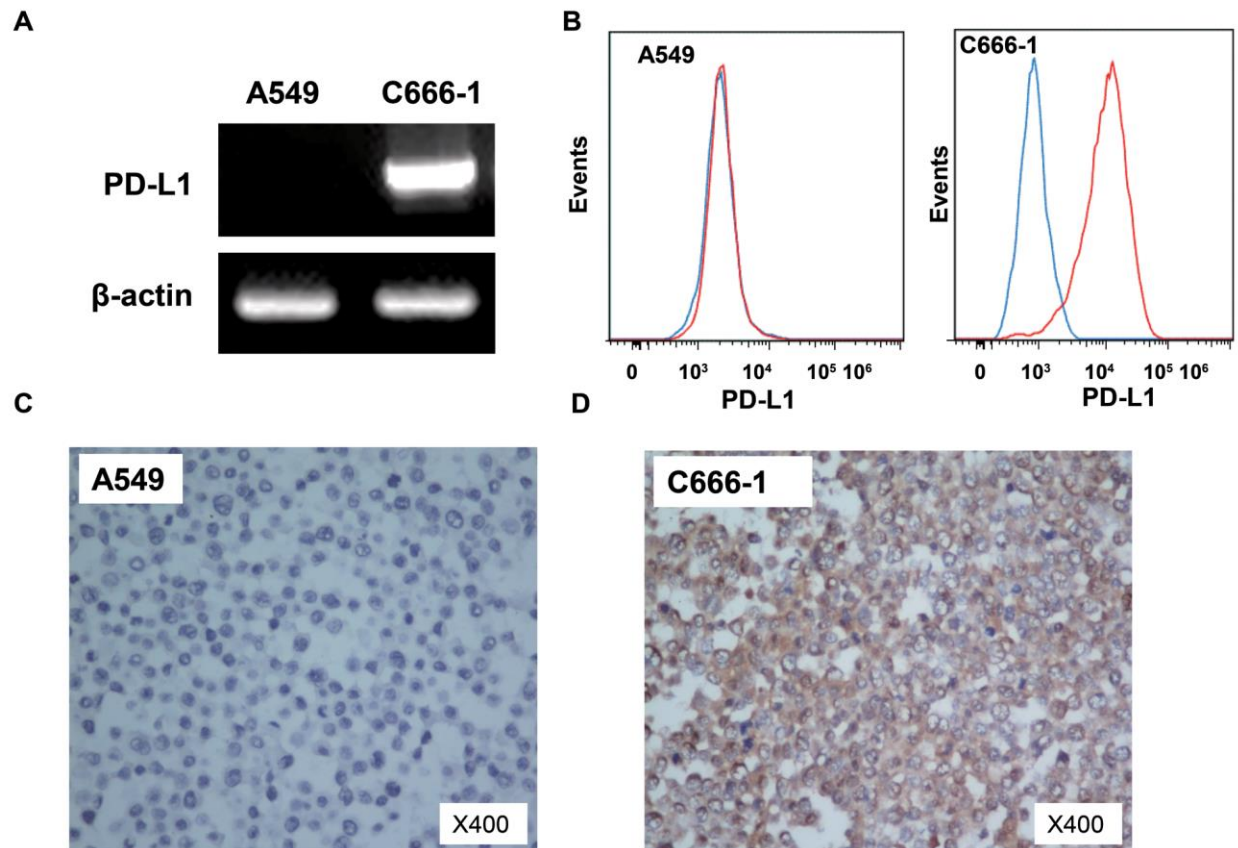

**Supplementary Figure S3:** The specificity validation of the PD-L1 antibody. (A) Relative quantification of PD-L1 mRNA level in A549 cells and C666-1 cells was analyzed with RT-PCR.  $\beta$ -actin was used to verify equal loading.(B) Cell-surface PD-L1 expression in A549 and C666-1 cell lines was analyzed with flow cytometric analysis (PD-L1, red line; isotype controls, blue line). (C, D) PD-L1 expression in A549 and C666-1 was analyzed with IHC. All experiments were repeated at least three times. Representative data are shown.

**Table S1:** Baseline clinical characteristic of all patients.

| <b>Characteristics</b>           | <b>(n=139)</b>   |                       |
|----------------------------------|------------------|-----------------------|
|                                  | <b>Cases (n)</b> | <b>Percentage (%)</b> |
| <b>Age (years)</b>               |                  |                       |
| Median (range)                   |                  | 45 (18-81)            |
| <b>Gender</b>                    |                  |                       |
| Male                             | 113              | 81.3                  |
| Female                           | 26               | 18.7                  |
| <b>Staging</b>                   |                  |                       |
| I                                | 2                | 1.4                   |
| II                               | 26               | 18.7                  |
| III                              | 59               | 42.4                  |
| IVa                              | 28               | 20.1                  |
| IVb                              | 12               | 8.6                   |
| IVc                              | 12               | 8.6                   |
| <b>Recurrence or metastasis*</b> |                  |                       |
| Yes                              | 60               | 47.2                  |
| No                               | 67               | 52.8                  |

\* Patients diagnosed at Stage IVc were excluded.

**Table S2:** Correlation between clinical parameters and the expression of PD-L1 in biopsies of nasopharyngeal carcinoma.

| Parameter           | PD-L1 expression |                |          |
|---------------------|------------------|----------------|----------|
|                     | PD-L1(h), n=62   | PD-L1(l), n=77 | <i>p</i> |
| <b>Age</b>          | 44.1±12.5        | 46.5±12.0      | 0.83     |
| <b>Gender</b>       |                  |                |          |
| Male                | 52 (82.5)        | 61 (80.3)      | 0.73     |
| Female              | 11 (17.5)        | 15 (19.7)      |          |
| <b>Tumor stage</b>  |                  |                |          |
| T1                  | 3 (4.8)          | 1 (1.3)        | 0.42     |
| T2                  | 25 (39.7)        | 24 (31.6)      |          |
| T3                  | 22 (34.9)        | 32 (42.1)      |          |
| T4                  | 13 (2.1)         | 19 (25.0)      |          |
| <b>Nodal status</b> |                  |                |          |
| N0                  | 15 (23.8)        | 11 (14.5)      | 0.12     |
| N1                  | 28 (44.4)        | 26 (34.2)      |          |
| N2                  | 15 (23.8)        | 27 (35.5)      |          |
| N3                  | 5 (7.9)          | 12 (15.8)      |          |
| <b>TNM stage</b>    |                  |                |          |
| I                   | 2 (3.2)          | 0              | 0.052    |
| II                  | 15 (23.8)        | 11 (14.5)      |          |
| III                 | 29 (46.0)        | 30 (39.5)      |          |
| IV                  | 17 (27.0)        | 35 (46.1)      |          |

Abbreviation: PD-L1(h), high expression (H-score >35) of PD-L1; PD-L1(l), low expression (H-score ≤ 35) of PD-L1;

**Table S3:** Univariate analysis to assess the association of clinical parameters with prognosis of nasopharyngeal carcinoma.

| Items               | Cases (n) | Univariate analysis $P^a$ |
|---------------------|-----------|---------------------------|
|                     |           | DFS                       |
| <b>Age (years)</b>  |           |                           |
| ≤ 45                | 71        | 0.88                      |
| > 45                | 68        |                           |
| <b>Gender</b>       |           |                           |
| Male                | 113       | 0.52                      |
| Female              | 26        |                           |
| <b>TNM stage</b>    |           |                           |
| Stage I, II         | 28        | 0.73                      |
| Stage III, IV       | 111       |                           |
| <b>PD-L1</b>        |           |                           |
| Low (H-score ≤ 35)  | 77        | <b>0.009</b>              |
| High (H-score > 35) | 62        |                           |

Note: <sup>a</sup> Log-rank test.

Abbreviations: PD-L1, programmed death- ligand 1; DFS, disease-free survival.

**Table S4:** Multivariate analysis for PD-L1 as a prognostic factor of nasopharyngeal carcinoma.

| <b>Items</b>            | <b>n</b> | <b>DFS</b>        |                       |
|-------------------------|----------|-------------------|-----------------------|
|                         |          | <b>HR (95%CI)</b> | <b><i>p</i> value</b> |
| <b>PD-L1</b>            |          |                   |                       |
| Low (H-score $\leq$ 35) | 77       | 2.78 (1.53-5.03)  | <b>0.001</b>          |
| High (H-score $>$ 35)   | 62       |                   |                       |

Abbreviation: PD-L1, program death-ligand 1; DFS, disease-free survival.
